# Supplementary material for: Genetic and Clinical Predictors of Age of ESKD in Individuals With Autosomal Dominant Tubulointerstitial Kidney Disease Due to UMOD Mutations
Source: PubMed Central journal article supplement — Kidney Int Rep. 2020 Jul 3;5(9):1472–85. doi: 10.1016/j.ekir.2020.06.029 (PMC7486199; doi:10.1016/j.ekir.2020.06.029), 2020-07-03
Supplement: mmc1.pdf [file mmc1.pdf]

## SUPPLEMENTARY MATERIAL

### Genetic and Clinical Predictors of Age of End-Stage Kidney Disease in Individuals with Autosomal Dominant Tubulo-Interstitial Kidney Disease due to *UMOD* mutations

#### Table of Contents

|                                                                                                                                                      |    |
|------------------------------------------------------------------------------------------------------------------------------------------------------|----|
| 1. Supplementary Table S1: Characteristics for each <i>UMOD</i> mutation in the registry.....                                                        | 2  |
| 2. Supplementary Figure S1. Western blot analysis of the indicated uromodulin mutant isoforms stably expressed in MDCK cells.....                    | 7  |
| 3. Supplementary Figure S2. Western blot analysis of the indicated uromodulin mutant isoforms transiently expressed in MDCK cells.....               | 8  |
| 4. Supplementary Figure S3: Subgroups comparing parental age of end stage kidney disease (ESKD) with child's age of ESKD.....                        | 9  |
| 5. Supplementary Figure S4: Histogram of difference in years between daughter's age of end stage kidney disease (ESKD) vs. mother's age of ESKD..... | 10 |
| 6. Supplementary Methods: Genetic evaluation and <i>UMOD</i> mutational sequencing .....                                                             | 11 |
| 7. Supplementary Methods: rs4293393 genotyping.....                                                                                                  | 11 |
| 8. Supplementary Methods: rs4293393 and <i>UMOD</i> mutation phase determination .....                                                               | 12 |
| 9. Supplementary Methods: <i>in vitro</i> score determination.....                                                                                   | 13 |
| 10. Supplementary References.....                                                                                                                    | 14 |

**1. Supplementary Table S1. Characteristics for each *UMOD* mutation in the study.** Range of ESKD is earliest age of ESKD and latest age of ESKD.

| <i>UMOD</i> |        |      | ADTKD- <i>UMOD</i> Individuals (n) |           |          | Age of ESKD (years) |       | Families linked to rs4293393 variant (n) |           |         |                       | References                                                                                                                 |
|-------------|--------|------|------------------------------------|-----------|----------|---------------------|-------|------------------------------------------|-----------|---------|-----------------------|----------------------------------------------------------------------------------------------------------------------------|
| Mutation    | Domain | Exon | Families                           | Genotyped | Historic | Median              | Range | major (A)                                | minor (G) | unknown | <i>in vitro</i> score | Citations given in supplemental references. If novel, investigator initials given. ClinVar accession number given if known |
| p.C32T      | EGF1   | 3    | 1                                  | 1         | 0        | --                  |       | 1                                        | 0         | 0       | --                    | novel, S.K.                                                                                                                |
| p.C32W      | EGF1   | 3    | 1                                  | 3         | 1        | 46                  | 41-52 | 1                                        | 0         | 0       | 2                     | 1-4                                                                                                                        |
| p.C32Y      | EGF1   | 3    | 1                                  | 4         | 0        | --                  | --    | 1                                        | 0         | 0       | 2                     | 4-6                                                                                                                        |
| p.E34K      | EGF1   | 3    | 1                                  | 3         | 0        | --                  | --    | 1                                        | 0         | 0       | --                    | 4, 5                                                                                                                       |
| p.A39T      | EGF1   | 3    | 4                                  | 10        | 0        | 66                  | 54-75 | 3                                        | 0         | 1       | 1                     | 4                                                                                                                          |
| p.C41Y      | EGF1   | 3    | 1                                  | 1         | 1        | 44                  | 44    | 1                                        | 0         | 0       | --                    | novel, A.J.B.                                                                                                              |
| p.C50S      | EGF1   | 3    | 1                                  | 2         | 0        | 24                  | 21-27 | 1                                        | 0         | 0       | 1                     | 4, 7, 8                                                                                                                    |
| p.C52S      | EGF1   | 3    | 1                                  | 3         | 4        | 41                  | 30-47 | 0                                        | 1         | 0       | --                    | 4                                                                                                                          |
| p.C52Y      | EGF1   | 3    | 1                                  | 4         | 2        | 45                  | 43-47 | 0                                        | 1         | 0       | --                    | 4, 9, 10                                                                                                                   |
| p.G55S      | EGF1   | 3    | 1                                  | 6         | 1        | 56                  | 44-60 | 1                                        | 0         | 0       | --                    | 11                                                                                                                         |
| p.D59A      | EGF1   | 3    | 1                                  | 2         | 0        | 60.5                | 59-62 | 1                                        | 0         | 0       | 2                     | 4, 5, 7, 12, 25                                                                                                            |
| p.D59Y      | EGF1   | 3    | 2                                  | 7         | 0        | 45                  | 41-49 | 2                                        | 0         | 0       | --                    | novel, G.C., G.G.                                                                                                          |
| p.T62P      | EGF1   | 3    | 1                                  | 2         | 0        | --                  | --    | 0                                        | 0         | 1       | --                    | 10, 13, ClinVar: VCV000318297.1                                                                                            |
| p.C63S      | EGF1   | 3    | 1                                  | 2         | 1        | 36.5                | 32-46 | 1                                        | 0         | 0       | --                    | 4, 14                                                                                                                      |
| p.D67G      | EGF2   | 3    | 1                                  | 1         | 0        | 41                  | 41    | 1                                        | 0         | 0       | --                    | novel, D.G., A.A.                                                                                                          |
| p.E68K      | EGF2   | 3    | 2                                  | 6         | 6        | 48                  | 32-76 | 2                                        | 0         | 0       | --                    | 4, 13                                                                                                                      |
| p.C69R      | EGF2   | 3    | 1                                  | 1         | 0        | --                  | --    | 1                                        | 0         | 0       | --                    | 4, 5                                                                                                                       |
| p.N76K      | EGF2   | 3    | 1                                  | 1         | 2        | 28                  | 19-33 | 1                                        | 0         | 0       | --                    | 4                                                                                                                          |
| p.N76S      | EGF2   | 3    | 1                                  | 1         | 0        | 26                  | 26    | 0                                        | 0         | 1       | --                    | novel, D.G., A.A.                                                                                                          |
| p.C77R      | EGF2   | 3    | 1                                  | 3         | 0        | 39                  | 39    | 1                                        | 0         | 0       | --                    | 4                                                                                                                          |
| p.C77S      | EGF2   | 3    | 1                                  | 2         | 0        | 32                  | 32    | 0                                        | 1         | 0       | --                    | 4, 15, ClinVar: VCV000448849.1                                                                                             |
| p.C77Y      | EGF2   | 3    | 1                                  | 4         | 0        | 48                  | 48    | 1                                        | 0         | 0       | 2                     | 4, 7, 12, 16, 17, ClinVar: VCV000012258.1                                                                                  |
| p.C83R      | EGF2   | 3    | 1                                  | 5         | 1        | 46                  | 46    | 0                                        | 1         | 0       | --                    | novel, A.J.B.                                                                                                              |
| p.C83S      | EGF2   | 3    | 1                                  | 2         | 0        | 20.5                | 18-23 | 1                                        | 0         | 0       | 3                     | novel, G.C., G.G.                                                                                                          |
| p.C83W      | EGF2   | 3    | 1                                  | 2         | 0        | 27                  | 27    | 1                                        | 0         | 0       | --                    | 2                                                                                                                          |

2 - Predictors of Progression in Individuals with ADTKD-*UMOD*

| UMOD                |        |      | ADTKD-UMOD Individuals (n) |           |          | Age of ESKD (years) |       | Families linked to rs4293393 variant (n) |           |         |                       | References                                                                                                                 |
|---------------------|--------|------|----------------------------|-----------|----------|---------------------|-------|------------------------------------------|-----------|---------|-----------------------|----------------------------------------------------------------------------------------------------------------------------|
| Mutation            | Domain | Exon | Families                   | Genotyped | Historic | Median              | Range | major (A)                                | minor (G) | unknown | <i>in vitro</i> score | Citations given in supplemental references. If novel, investigator initials given. ClinVar accession number given if known |
| p.N85K              | EGF2   | 3    | 1                          | 1         | 1        | 55                  | 44-66 | 1                                        | 0         | 0       | --                    | 19, ClinVar: VCV000562434.1                                                                                                |
| p.N85S              | EGF2   | 3    | 1                          | 1         | 1        | 41                  | 41    | 1                                        | 0         | 0       | --                    | novel, A.J.B., ClinVar: VCV000384591.1                                                                                     |
| p.G88D              | EGF2   | 3    | 8                          | 23        | 0        | 65.5                | 55-76 | 7                                        | 0         | 1       | 1                     | 4                                                                                                                          |
| p.G88V              | EGF2   | 3    | 2                          | 2         | 0        | 51.5                | 44-59 | 1                                        | 1         | 0       | --                    | 13                                                                                                                         |
| p.S91del            | EGF2   | 3    | 5                          | 13        | 4        | 50                  | 37-66 | 5                                        | 0         | 0       | 2                     | 13                                                                                                                         |
| p.C92G              | EGF2   | 3    | 1                          | 3         | 0        | 31.5                | 23-40 | 0                                        | 0         | 1       | --                    | novel, O.D.                                                                                                                |
| p.C92Y              | EGF2   | 3    | 2                          | 6         | 3        | 42.5                | 40-52 | 2                                        | 0         | 0       | --                    | 4                                                                                                                          |
| p.V93-G97delinsAASC | EGF2   | 3    | 11                         | 44        | 30       | 48                  | 27-75 | 10                                       | 0         | 1       | 2                     | 2, 12, 18, 20, 21                                                                                                          |
| p.C94W              | EGF2   | 3    | 1                          | 2         | 5        | 41                  | 28-53 | 1                                        | 0         | 0       | --                    | 4, 23                                                                                                                      |
| p.C94Y              | EGF2   | 3    | 1                          | 2         | 0        | 42                  | 42    | 1                                        | 0         | 0       | --                    | novel, D.G., A.A.                                                                                                          |
| p.G103C             | EGF3   | 3    | 1                          | 6         | 5        | 36                  | 24-49 | 1                                        | 0         | 0       | --                    | 2, 4, 12, 24, ClinVar: VCV000012257.1                                                                                      |
| p.G105C             | EGF3   | 3    | 1                          | 1         | 0        | 47                  | 47    | 1                                        | 0         | 0       | --                    | novel, D.G., A.A.                                                                                                          |
| p.C106F             | EGF3   | 3    | 10                         | 26        | 21       | 55                  | 35-72 | 10                                       | 0         | 0       | 1                     | 4, 19, 23, ClinVar: VCV000094129.3                                                                                         |
| p.C106G             | EGF3   | 3    | 2                          | 7         | 4        | 51.5                | 35-68 | 1                                        | 1         | 0       | --                    | 4, 23                                                                                                                      |
| p.C106Y             | EGF3   | 3    | 1                          | 4         | 2        | 70                  | 60-84 | 1                                        | 0         | 0       | 2                     | 4, 7, 21, 23                                                                                                               |
| p.C112R             | EGF3   | 3    | 2                          | 5         | 0        | 63                  | 59-64 | 2                                        | 0         | 0       | 4                     | 4, 5, 7, 12                                                                                                                |
| p.C112Y             | EGF3   | 3    | 1                          | 4         | 0        | 22                  | 22    | 1                                        | 0         | 0       | --                    | 4, 17, 25, 26                                                                                                              |
| p.C120R             | EGF3   | 3    | 1                          | 2         | 0        | 36                  | 36    | 1                                        | 0         | 0       | --                    | 27                                                                                                                         |
| p.C126R             | EGF3   | 3    | 1                          | 3         | 0        | --                  | --    | 1                                        | 0         | 0       | 4                     | 4, 5, 7, 12, 16, 25 ClinVar: VCV000012259.1                                                                                |
| p.N128S             | EGF3   | 3    | 3                          | 10        | 2        | 45                  | 41-78 | 2                                        | 1         | 0       | 4                     | 2, 4, 12, 28, ClinVar: VCV000012260.1                                                                                      |
| p.C135F             | EGF3   | 3    | 2                          | 4         | 2        | 45                  | 44-46 | 2                                        | 0         | 0       | --                    | 4                                                                                                                          |
| p.C135S             | EGF3   | 3    | 1                          | 1         | 1        | 41.5                | 35-48 | 1                                        | 0         | 0       | --                    | 2, 4, 5, 7, 12                                                                                                             |
| p.C135W             | EGF3   | 3    | 1                          | 5         | 1        | 36                  | 36    | 1                                        | 0         | 0       | --                    | novel, A.J.B.                                                                                                              |
| p.C135Y             | EGF3   | 3    | 2                          | 14        | 3        | 41                  | 37-47 | 2                                        | 0         | 0       | 4                     | 4, 5                                                                                                                       |
| p.C137R             | EGF3   | 3    | 1                          | 2         | 0        | 48                  | 48    | 0                                        | 0         | 1       | --                    | novel, G.C., G.G.                                                                                                          |

### 3 - Predictors of Progression in Individuals with ADTKD-UMOD

| UMOD           |            |      | ADTKD-UMOD Individuals (n) |           |          | Age of ESKD (years) |       | Families linked to rs4293393 variant (n) |           |         |                       | References                                                                                                                 |
|----------------|------------|------|----------------------------|-----------|----------|---------------------|-------|------------------------------------------|-----------|---------|-----------------------|----------------------------------------------------------------------------------------------------------------------------|
| Mutation       | Domain     | Exon | Families                   | Genotyped | Historic | Median              | Range | major (A)                                | minor (G) | unknown | <i>in vitro</i> score | Citations given in supplemental references. If novel, investigator initials given. ClinVar accession number given if known |
| p.C148R        | EGF3       | 3    | 1                          | 6         | 0        | 33                  | 28-41 | 1                                        | 0         | 0       | 4                     | 4, 5                                                                                                                       |
| p.C148S        | EGF3       | 3    | 2                          | 7         | 4        | 51                  | 32-60 | 2                                        | 0         | 0       | --                    | 4                                                                                                                          |
| p.C148Y        | EGF3       | 3    | 4                          | 14        | 11       | 44                  | 25-66 | 4                                        | 0         | 0       | 4                     | 2, 4, 13, 24, ClinVar: VCV000012255.1                                                                                      |
| p.C150S        | Cys-Rich 1 | 3    | 1                          | 6         | 0        | 49                  | 42-59 | 1                                        | 0         | 0       | 4                     | 4, 17, 21                                                                                                                  |
| p.C150Y        | Cys-Rich 1 | 3    | 1                          | 1         | 0        | --                  | --    | 1                                        | 0         | 0       | --                    | novel, D.G., A.A.                                                                                                          |
| p.G153C        | Cys-Rich 1 | 3    | 1                          | 5         | 0        | 57                  | 57    | 1                                        | 0         | 0       | --                    | 29                                                                                                                         |
| p.C170Y        | Cys-Rich 1 | 3    | 2                          | 7         | 0        | 58                  | 58    | 2                                        | 0         | 0       | --                    | 4, 5, 7, 10, 12, 25                                                                                                        |
| p.D172H        | Cys-Rich 1 | 3    | 2                          | 10        | 2        | --                  | --    | 2                                        | 0         | 0       | --                    | 4, 5                                                                                                                       |
| p.P173L        | Cys-Rich 1 | 3    | 1                          | 2         | 1        | --                  | --    | 1                                        | 0         | 0       | --                    | 4                                                                                                                          |
| p.P173T        | Cys-Rich 1 | 3    | 1                          | 2         | 0        | 51                  | 51    | 1                                        | 0         | 0       | --                    | novel, G.C., G.G.                                                                                                          |
| p.C174R        | Cys-Rich 1 | 3    | 1                          | 5         | 2        | 63.5                | 63-64 | 1                                        | 0         | 0       | --                    | 4, 7                                                                                                                       |
| p.H177-R185del | Cys-Rich 1 | 3    | 25                         | 108       | 65       | 46                  | 20-87 | 25                                       | 0         | 0       | 3                     | 12, 24, ClinVar: VCV000012254.1                                                                                            |
| p.R178P        | Cys-Rich 1 | 3    | 9                          | 21        | 27       | 53                  | 39-79 | 8                                        | 0         | 1       | 4                     | 4, 15, ClinVar: VCV000586921.1                                                                                             |
| p.L180P        | Cys-Rich 1 | 3    | 2                          | 8         | 4        | 62                  | 38-75 | 2                                        | 0         | 0       | --                    | novel, A.J.B., O.D., S.K., ClinVar: VCV000196361.1                                                                         |
| p.R185C        | Cys-Rich 1 | 3    | 3                          | 4         | 1        | 38                  | 38    | 2                                        | 1         | 0       | --                    | 4, 5, 15, 25, ClinVar: VCV000586922.1                                                                                      |
| p.R185G        | Cys-Rich 1 | 3    | 1                          | 4         | 2        | 42                  | 42    | 1                                        | 0         | 0       | --                    | 1-4                                                                                                                        |
| p.R185H        | Cys-Rich 1 | 3    | 3                          | 9         | 0        | 58                  | 56-62 | 3                                        | 0         | 0       | --                    | 4, 5                                                                                                                       |
| p.R185S        | Cys-Rich 1 | 3    | 1                          | 10        | 0        | 33                  | 27-40 | 1                                        | 0         | 0       | --                    | 5, 7, 12                                                                                                                   |
| p.D196A        | Cys-Rich 1 | 3    | 1                          | 2         | 0        | 40                  | 40    | 1                                        | 0         | 0       | --                    | 4, 5, 7, 16, 30                                                                                                            |
| p.D196Y        | Cys-Rich 1 | 3    | 3                          | 7         | 0        | 38                  | 28-48 | 2                                        | 1         | 0       | --                    | 1, 5, 7, 21                                                                                                                |
| p.G201D        | Dom 8 Cys  | 3    | 1                          | 1         | 0        | --                  | --    | 1                                        | 0         | 0       | --                    | novel, O.D.                                                                                                                |
| p.W202C        | Dom 8 Cys  | 3    | 1                          | 1         | 0        | 55                  | 55    | 1                                        | 0         | 0       | --                    | 4, 9                                                                                                                       |
| p.W202R        | Dom 8 Cys  | 3    | 1                          | 5         | 0        | 38                  | 38    | 1                                        | 0         | 0       | --                    | novel, G.C., G.G.                                                                                                          |
| p.W202S        | Dom 8 Cys  | 3    | 2                          | 3         | 1        | 38                  | 34-50 | 1                                        | 0         | 0       | --                    | 2, 4, 12                                                                                                                   |
| p.Y203D        | Dom 8 Cys  | 3    | 1                          | 3         | 2        | 62                  | 59-71 | 1                                        | 0         | 0       | --                    | novel, A.J.B.                                                                                                              |

#### 4 - Predictors of Progression in Individuals with ADTKD-UMOD

| UMOD           |           |      | ADTKD-UMOD Individuals (n) |           |          | Age of ESKD (years) |       | Families linked to rs4293393 variant (n) |           |         |                       | References                                                                                                                 |
|----------------|-----------|------|----------------------------|-----------|----------|---------------------|-------|------------------------------------------|-----------|---------|-----------------------|----------------------------------------------------------------------------------------------------------------------------|
| Mutation       | Domain    | Exon | Families                   | Genotyped | Historic | Median              | Range | major (A)                                | minor (G) | unknown | <i>in vitro</i> score | Citations given in supplemental references. If novel, investigator initials given. ClinVar accession number given if known |
| p.G209D        | Dom 8 Cys | 3    | 1                          | 3         | 0        | 46                  | 46    | 1                                        | 0         | 0       | --                    | novel, G.C., G.G.                                                                                                          |
| p.G210D        | Dom 8 Cys | 3    | 1                          | 2         | 0        | --                  | --    | 1                                        | 0         | 0       | --                    | 4, 13                                                                                                                      |
| p.G210R        | Dom 8 Cys | 3    | 1                          | 3         | 0        | --                  | --    | 1                                        | 0         | 0       | 2                     | 31                                                                                                                         |
| p.G210S        | Dom 8 Cys | 3    | 1                          | 2         | 0        | --                  | --    | 1                                        | 0         | 1       | --                    | 4, 5, 19, ClinVar: VCV000562320.1                                                                                          |
| p.R212C        | Dom 8 Cys | 3    | 3                          | 9         | 0        | 65                  | 43-65 | 3                                        | 0         | 0       | 3                     | 4                                                                                                                          |
| p.C217F        | Dom 8 Cys | 3    | 1                          | 1         | 0        | 32                  | 32-32 | 1                                        | 0         | 0       | --                    | novel, G.C., G.G.                                                                                                          |
| p.C217G        | Dom 8 Cys | 3    | 1                          | 2         | 0        | 37                  | 37    | 1                                        | 0         | 0       | 3                     | 4, 5, 7, 12, 25, ClinVar: VCV000039418.1                                                                                   |
| p.C217R        | Dom 8 Cys | 3    | 1                          | 5         | 0        | 50                  | 50    | 1                                        | 0         | 0       | 3                     | 2, 4, 12, 24, ClinVar: VCV000012256.1                                                                                      |
| p.P219L        | Dom 8 Cys | 3    | 1                          | 3         | 0        | --                  | --    | 1                                        | 0         | 0       | --                    | novel, C.I., F.S.                                                                                                          |
| p.R222P        | Dom 8 Cys | 3    | 1                          | 10        | 0        | 51.5                | 29-67 | 1                                        | 0         | 0       | --                    | 4, 5, 7, 12, 25                                                                                                            |
| p.C223G        | Dom 8 Cys | 3    | 1                          | 2         | 0        | 56                  | 56    | 1                                        | 0         | 0       | --                    | 32                                                                                                                         |
| p.C223R        | Dom 8 Cys | 3    | 1                          | 1         | 0        | --                  | --    | 1                                        | 0         | 0       | 4                     | 1-4, 7, 16                                                                                                                 |
| p.C223Y        | Dom 8 Cys | 3    | 2                          | 4         | 1        | 48                  | 38-50 | 2                                        | 0         | 0       | --                    | 2, 4, 7, 12, 33                                                                                                            |
| p.T225M        | Dom 8 Cys | 3    | 2                          | 12        | 0        | 38                  | 38    | 2                                        | 0         | 0       | --                    | 4, 5, 7, 12, 25                                                                                                            |
| p.M229R        | Dom 8 Cys | 3    | 2                          | 8         | 0        | 50                  | 34-62 | 2                                        | 0         | 0       | 3                     | 2, 4, 6, 7                                                                                                                 |
| p.W230R        | Dom 8 Cys | 3    | 1                          | 4         | 0        | 60                  | 57-63 | 1                                        | 1         | 0       | --                    | 4, 7, 13, 21, 34                                                                                                           |
| p.H235Q        | Dom 8 Cys | 3    | 2                          | 5         | 0        | 51.5                | 45-58 | 0                                        | 2         | 0       | --                    | 4                                                                                                                          |
| p.P236L        | Dom 8 Cys | 3    | 4                          | 13        | 7        | 45                  | 43-67 | 4                                        | 0         | 0       | 3                     | 5, 6, 12, ClinVar: VCV000521547.1                                                                                          |
| p.P236R        | Dom 8 Cys | 3    | 4                          | 8         | 1        | 40                  | 24-50 | 3                                        | 0         | 1       | 4                     | 4, 35                                                                                                                      |
| p.P236S        | Dom 8 Cys | 3    | 1                          | 3         | 0        | --                  | --    | 1                                        | 0         | 0       | --                    | 4                                                                                                                          |
| p.R245P        | Dom 8 Cys | 3    | 1                          | 3         | 0        | 52                  | 52    | 1                                        | 0         | 0       | --                    | novel, D.G., A.A.                                                                                                          |
| p.K246-S252del | Dom 8 Cys | 3    | 1                          | 2         | 0        | 43.5                | 39-48 | 1                                        | 0         | 0       | --                    | 36                                                                                                                         |
| p.C248W        | Dom 8 Cys | 3    | 3                          | 4         | 2        | 71                  | 71    | 2                                        | 1         | 0       | --                    | 2, 4, 7, 12, 20, 37, ClinVar: VCV000287876.1                                                                               |
| p.H250Q        | Dom 8 Cys | 3    | 1                          | 1         | 0        | --                  | --    | 0                                        | 0         | 1       | --                    | 4                                                                                                                          |
| p.C255Y        | Dom 8 Cys | 3    | 1                          | 5         | 0        | 56                  | 40-78 | 1                                        | 0         | 0       | --                    | 2, 9, 12, 28, 38, ClinVar: VCV000012261.1                                                                                  |
| p.C256Y        | Dom 8 Cys | 3    | 1                          | 5         | 0        | 46                  | 39-60 | 1                                        | 0         | 0       | 3                     | 4                                                                                                                          |

##### 5 - Predictors of Progression in Individuals with ADTKD-UMOD

| UMOD      |            |      | ADTKD-UMOD Individuals (n) |           |          | Age of ESKD (years) |       | Families linked to rs4293393 variant (n) |           |         |                       | References                                                                                                                 |
|-----------|------------|------|----------------------------|-----------|----------|---------------------|-------|------------------------------------------|-----------|---------|-----------------------|----------------------------------------------------------------------------------------------------------------------------|
| Mutation  | Domain     | Exon | Families                   | Genotyped | Historic | Median              | Range | major (A)                                | minor (G) | unknown | <i>in vitro</i> score | Citations given in supplemental references. If novel, investigator initials given. ClinVar accession number given if known |
| p.L257P   | Dom 8 Cys  | 3    | 2                          | 7         | 2        | 46                  | 38-59 | 2                                        | 0         | 0       | --                    | 4                                                                                                                          |
| p.W258C   | Dom 8 Cys  | 3    | 1                          | 1         | 1        | 35                  | 35    | 0                                        | 1         | 0       | --                    | 19, ClinVar: VCV000562394.1                                                                                                |
| p.C267F   | Dom 8 Cys  | 3    | 1                          | 2         | 1        | 63                  | 52-74 | 1                                        | 0         | 0       | --                    | 4                                                                                                                          |
| p.G269C   | Dom 8 Cys  | 3    | 1                          | 1         | 2        | 59                  | 49-69 | 1                                        | 0         | 0       | --                    | 4                                                                                                                          |
| p.G270C   | Dom 8 Cys  | 3    | 1                          | 3         | 0        | 28                  | 28    | 1                                        | 0         | 0       | --                    | 4                                                                                                                          |
| p.Y272del | Dom 8 Cys  | 3    | 1                          | 2         | 0        | 62                  | 62    | 1                                        | 0         | 0       | --                    | novel, O.D.                                                                                                                |
| p.V273F   | Dom 8 Cys  | 3    | 1                          | 3         | 0        | --                  | --    | 1                                        | 0         | 0       | 4                     | 2, 4, 7, ClinVar: VCV000012264.1                                                                                           |
| p.V273L   | Dom 8 Cys  | 3    | 1                          | 3         | 0        | --                  | --    | 1                                        | 0         | 0       | --                    | 5                                                                                                                          |
| p.Y274H   | Dom 8 Cys  | 3    | 1                          | 2         | 1        | 48                  | 46-50 | 1                                        | 0         | 0       | --                    | 4                                                                                                                          |
| p.C282R   | Dom 8 Cys  | 3    | 1                          | 2         | 0        | --                  | --    | 0                                        | 0         | 1       | --                    | 4, 25                                                                                                                      |
| p.C282S   | Dom 8 Cys  | 3    | 1                          | 2         | 1        | 32                  | 32    | 1                                        | 0         | 0       | 2                     | 4, 5, 12                                                                                                                   |
| p.A285E   | Dom 8 Cys  | 3    | 1                          | 2         | 0        | 42                  | 42    | 1                                        | 0         | 0       | --                    | 4, 5, 10                                                                                                                   |
| p.Y286C   | Dom 8 Cys  | 3    | 1                          | 2         | 2        | 42.5                | 34-51 | 1                                        | 0         | 0       | --                    | novel, A.J.B.                                                                                                              |
| p.C287R   | Dom 8 Cys  | 3    | 1                          | 1         | 0        | 37                  | 37    | 0                                        | 0         | 1       | --                    | novel, J.C.                                                                                                                |
| p.C287Y   | Dom 8 Cys  | 3    | 1                          | 1         | 0        | --                  | --    | 1                                        | 0         | 0       | --                    | 13                                                                                                                         |
| p.C297W   | Cys-Rich 2 | 4    | 1                          | 4         | 0        | 39                  | 39    | 1                                        | 0         | 0       | --                    | 4, 5, 39                                                                                                                   |
| p.C300G   | Cys-Rich 2 | 4    | 2                          | 5         | 1        | 60                  | 49-71 | 1                                        | 1         | 0       | --                    | 2, 7, 12, 21, 28, 40, ClinVar: VCV000012262.1                                                                              |
| p.C306Y   | Cys-Rich 2 | 4    | 2                          | 5         | 0        | 49.5                | 42-57 | 2                                        | 0         | 0       | --                    | 4, 13                                                                                                                      |
| p.C315R   | Cys-Rich 2 | 4    | 3                          | 6         | 0        | --                  | --    | 2                                        | 1         | 0       | 2                     | 2, 4, 12, 40, 41, ClinVar: VCV000012263.1                                                                                  |
| p.C315Y   | Cys-Rich 2 | 4    | 1                          | 5         | 0        | 45                  | 45    | 1                                        | 0         | 0       | --                    | 4, 5, ClinVar: VCV000094133.1                                                                                              |
| p.C317Y   | Cys-Rich 2 | 4    | 2                          | 6         | 0        | 54                  | 54    | 2                                        | 0         | 0       | 2                     | 4, 4, 7, 12, 41                                                                                                            |
| p.L333P   | Cys-Rich 2 | 4    | 1                          | 2         | 0        | --                  | --    | 1                                        | 0         | 0       | --                    | novel, C.I., F.S.                                                                                                          |
| p.G488D   | ZP         | 7    | 2                          | 4         | 0        | 49                  | 18-56 | 2                                        | 0         | 0       | --                    | novel, J.C., ClinVar: VCV000437927.1                                                                                       |

## 6 - Predictors of Progression in Individuals with ADTKD-UMOD

**2. Supplementary Figure S1.** Western blot analysis of the indicated uromodulin mutant isoforms stably expressed in MDCK cells. Three independent experiments are shown. Graphs represent the quantification of each experiment and the average of the three experiments.

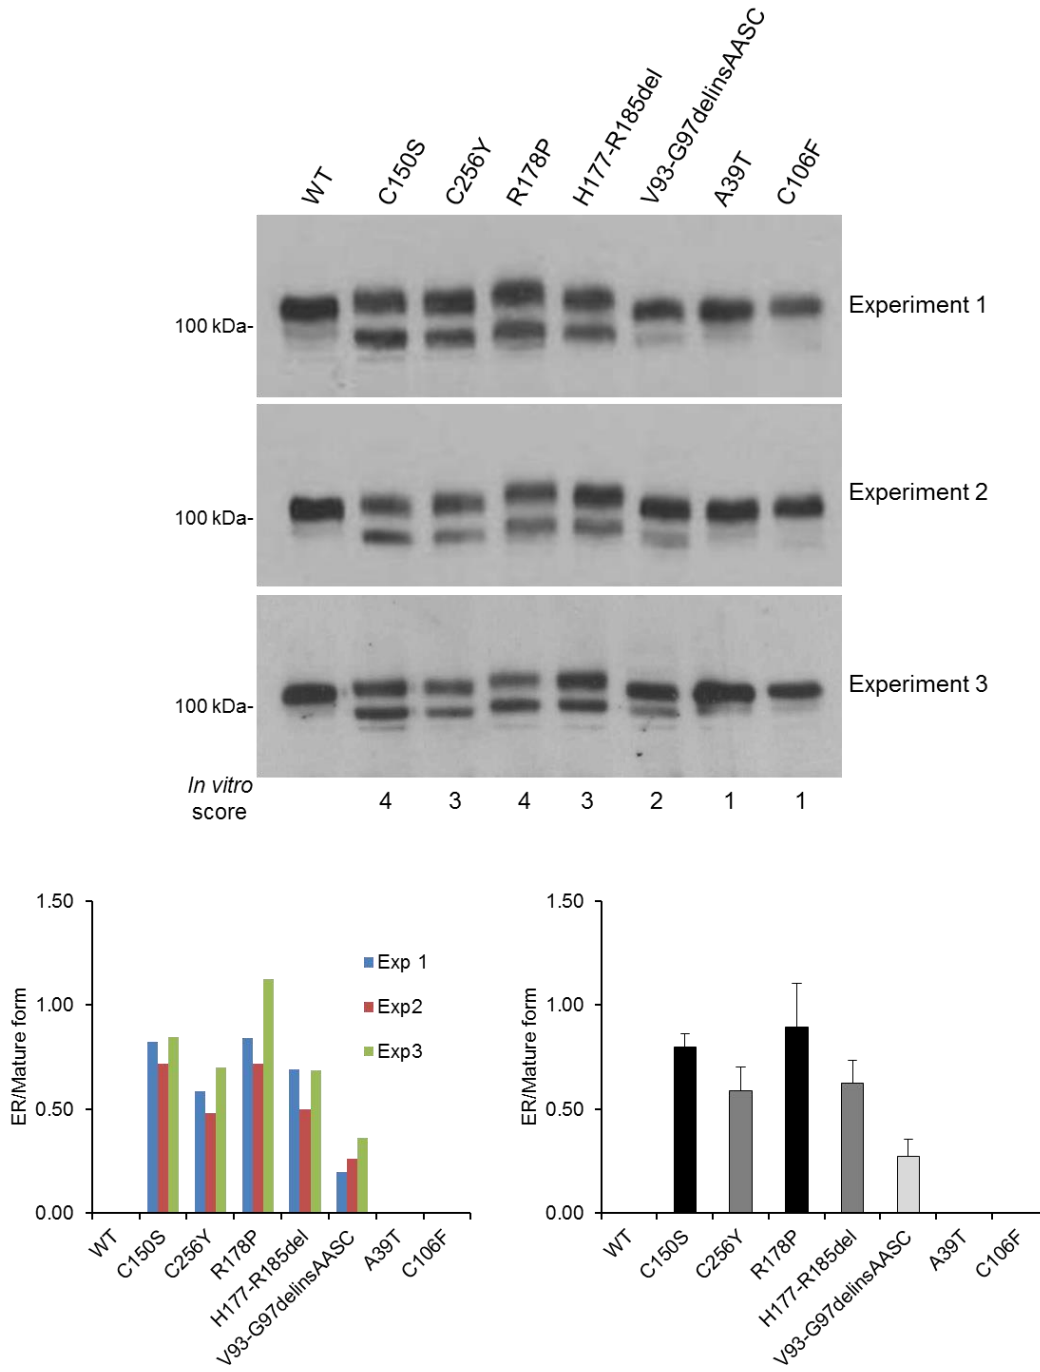

**3. Supplementary Figure S2.** Western blot analysis of the indicated uromodulin mutant isoforms transiently expressed in MDCK cells. Quantification is shown below. The classification of mutant isoforms is similar to the one obtained in stably transfected MDCK cells, although the difference between the classes is less pronounced due to generally higher levels of ER retained protein (see for instance wild type uromodulin in this blot compared to Supplementary Figure S1).

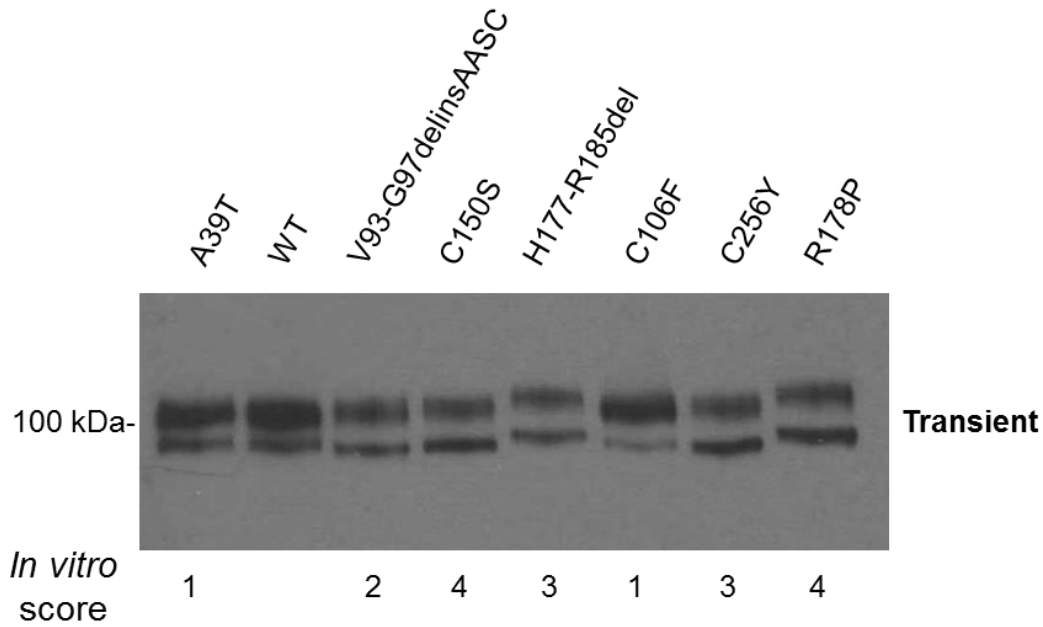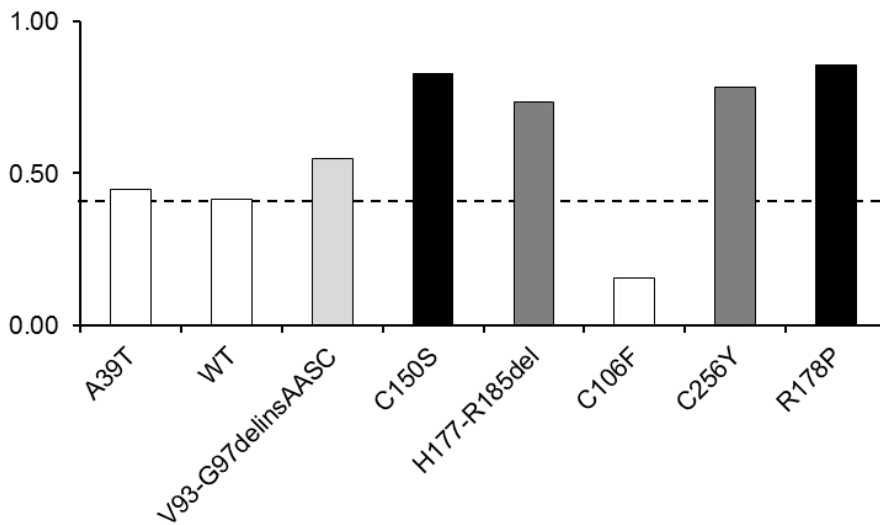



**4. Supplementary Figure S3. Subgroups comparing parental age of end stage kidney disease (ESKD) with child's age of ESKD.** A. Mother's age of ESKD vs. Daughter's age of ESKD. B. Father's age of ESKD vs. Daughter's age of ESKD. C. Mother's age of ESKD vs. Son's age of ESKD. D. Father's age of ESKD vs. Son's age of ESKD.

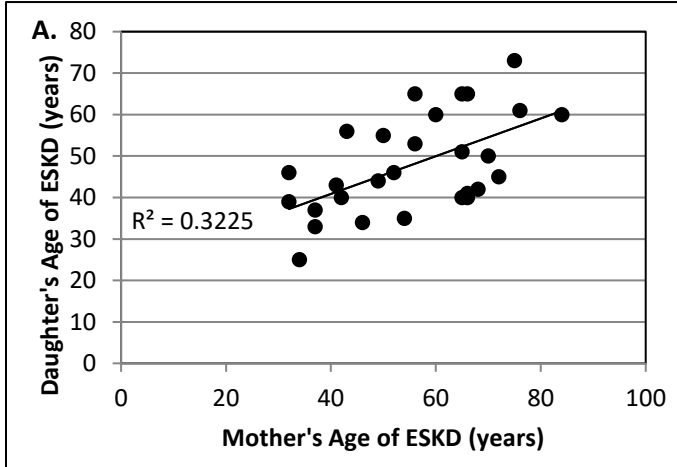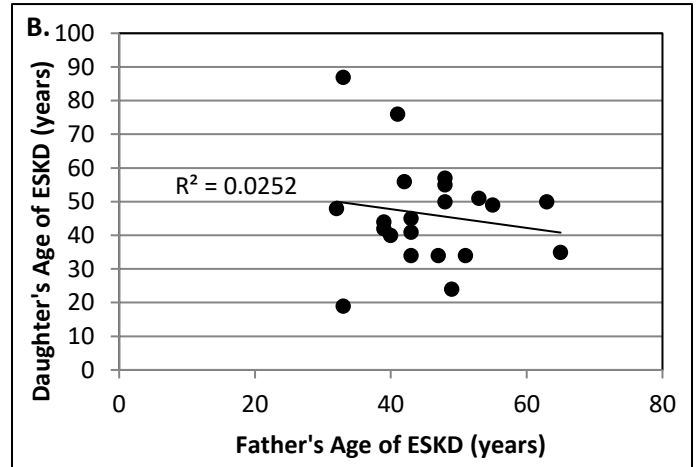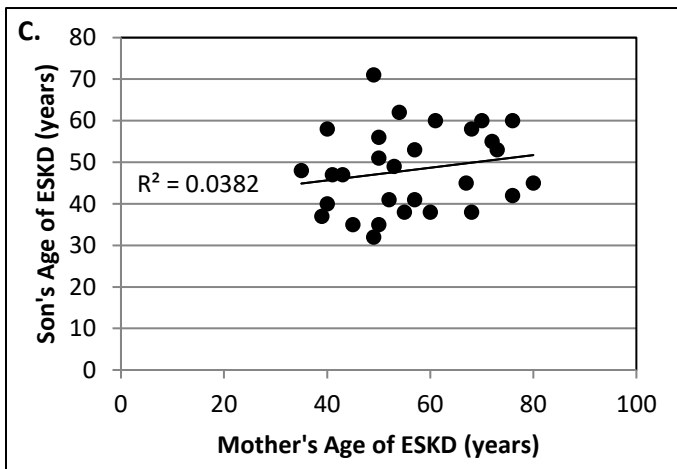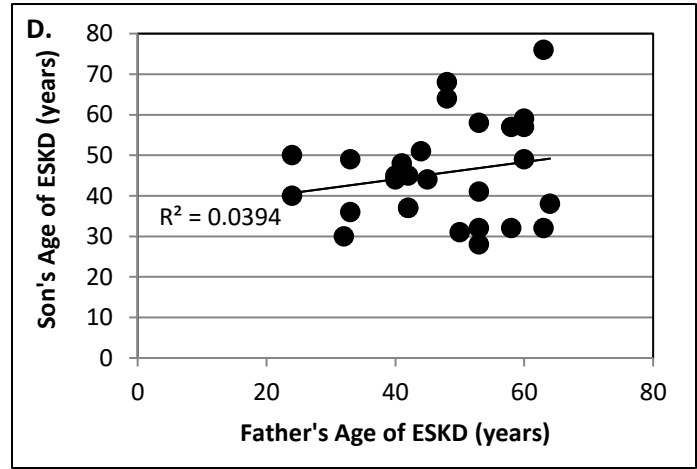

**4. Supplementary Figure S4. Histogram of difference in years between daughter's age of end stage kidney disease (ESKD) vs. mother's age of ESKD.**

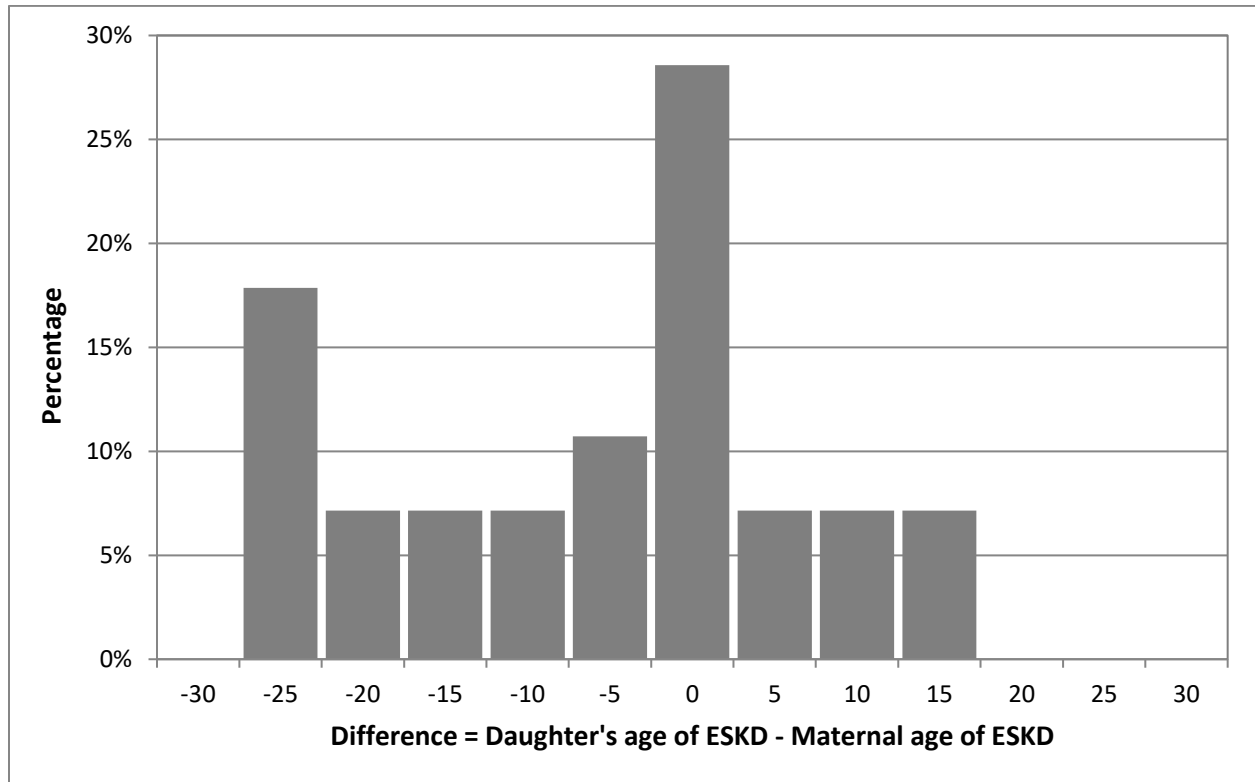

## 6. Supplementary Methods: Genetic evaluation and *UMOD* mutational sequencing.

Individuals undergoing *UMOD* mutational analysis for the WF Cohort and some patients in the International Cohort from collaborators P.V., M.Ž., K.H, M.V., A.V., P.C, S.M. K.A.B., G.C, E.G. were analyzed as follows:

| Primers               | Exon | Cycling Conditions                                                                             | Reaction Composition                                                                                                                       |
|-----------------------|------|------------------------------------------------------------------------------------------------|--------------------------------------------------------------------------------------------------------------------------------------------|
| GGTGGAGGCTTGACATC     | 3    | 1x 95 °C/2 min, 35x (95 °C/15 sec, 66 °C/20 sec, 70 °C/40 sec), 1x 70 °C/5 min, 1x 15 °C/fe    | DMSO 1%, extra MgCl <sub>2</sub> 2 mM, dNTPs 0.2 mM each, primers 0.3 μM each, gDNA 10 ng                                                  |
| CTCCACGGAGCTGGGGTCTG  |      |                                                                                                |                                                                                                                                            |
| AACTGCTCCGCCAACAGCAG  | 3B/4 | 1x 94 °C/5 min, 35x (94 °C/10 sec, 66.4 °C/10 sec, 74 °C/70 sec), 1x 74 °C/10 min, 1x 15 °C/fe | DMSO 4%,extra MgCl <sub>2</sub> 2 mM, dNTPs 0.2 mM each, primers 0.5 μM each, Deep Vent <sub>R</sub> <sup>™</sup> 1:0,0016 U/U, gDNA 10 ng |
| RP-GGAATAGGGCTCAGATG  |      |                                                                                                |                                                                                                                                            |
| T7-AGCAGCATCCAGGCAC   | 7    | 1x 94 °C/5 min, 40x (94 °C/10 sec, 70 °C/15 sec, 74 °C/50 sec), 1x 74 °C/10 min, 1x 15 °C/fe   | DMSO 4%, extra MgCl <sub>2</sub> 2 mM, dNTPs 0.2 mM each, primers 0.1 μM each, gDNA 10 ng                                                  |
| RP-GTCCAAAGACCCCCTCTG |      |                                                                                                |                                                                                                                                            |

Where indicated, T7 = AATACGACTCACTATAG, RP = GAAACAGCTATGACCAT are universal primers used for post PCR cycle sequencing.

For other patients in the International cohort, *UMOD* mutational analysis is described by collaborators in the following Supplementary References: E.O., O.D, (5); C.S., L.R, C.I., A.A., D.G., G.C., G.G., F.S, L.R (2); S.C.J., J.C, C.S, R.R. (22); R.J.T. (28); K.L. (16); D.S.(29); D.P.G, C.G. (13); J.R.A., C.F.S. (11).

## 7. Supplementary Methods: rs4293393 genotyping.

rs4293393 genotyping was performed using genotyping by TaqMan<sup>®</sup> SNP Genotyping Assays with the TaqMan<sup>®</sup> Genotyping Master Mix (Applied Biosystems). 10 μL amplification reactions were set in a MicroAmp<sup>®</sup> Fast Optical 96-Well Reaction Plate as follows: 5 μL of 2x genotyping master mix, 0.5 μL of 20x genotyping assay working solution and 4.5 μL of 3-10 ng/μL gDNA. Plates were processed in StepOnePlus<sup>™</sup> Real-Time PCR System (Applied Biosystems, CA, USA) under Standard Mode thermal cycling conditions: 1x 95°C/10 minutes, 40x (95°C/15 seconds, 60°C/1 minute). Data were analyzed by StepOne<sup>™</sup> Software v2.1 (Applied Biosystems, CA, USA) in autocal default, 2-cluster or single cluster manual calling analytical mode.

For some patients the rs4293393 SNP genotype was analyzed by a pyrosequencing assay on a PyroMark Q96MA apparatus (Qiagen, Hilden, Germany). PCR amplification was carried out with the following primers: 5'biotin-ACCAGATAAAGGAGGCAGACT-3' (forward) and 5'-GAGATCAGCCTTAGAATCCAGA-3' (reverse) with GoTaq Master Mix (Promega Corporation, Madison, WI, USA). Samples were denaturated at 94°C for 5 min, amplified for 35 cycles consisting of 94°C for 30 sec, 60°C for 30 sec and 72°C for 45 sec

and elongated at 72°C for 7 min. The 5'-biotinylated PCR product of the region including the rs4293393 SNP was immobilized onto streptavidin-coated paramagnetic beads, denaturated by 0.1mol/l NaOH and released according to manufacturer' instructions. The primed single-stranded DNA templates were subjected to real-time sequencing of the region including SNP by using the following reverse primer: 5'TCAGAACCAGAAGGTA -3'.

## **8. Supplementary Methods: rs4293393 and *UMOD* mutation phase determination**

The *UMOD* gene sequence from the promoter to exon 4 was PCR amplified from gDNA by TaKaRa LA Taq DNA Polymerase with GC Buffer I (TaKaRa Bio, France). The 25 µL reaction was composed of 1x GC Buffer I, 0.4 mM each dNTP, 0.2 µM each upper (CAGCAAACACTATCGCAAGGA) and lower (AAGTCATGGCACAGGTAACAC) primer, 1.25 U TaKaRa LA Taq DNA Polymerase, 30 ng template gDNA and ddH<sub>2</sub>O and produced amplicons of 6388 bp. DNA Engine Dyad Peltier Thermal Cycler (Bio-Rad, CA, USA) thermal conditions were as follows: 94 °C/5 minutes, 30x (94 °C/15 seconds, 61 °C/30 seconds, 72 °C/6 minutes with 10 seconds increment per cycle), 72 °C/10 minutes and 15 °C temperature. PCR products were separated in 1% agarose gel in TAE buffer (40 mM Tris Base, 20 mM acetic acid, 1 mM sodium EDTA dehydrate) with 0.5x GelGreen dye (Biotium, CA, USA) and purified by PureLink™ Quick Gel Extraction Kit (ThermoFisher Scientific, MA, USA) according to manufacturer's instructions.

Maternal and paternal amplicons were separated by cloning using the TOPO® XL PCR Cloning Kit (ThermoFisher Scientific, MA, USA). 5 µL TOPO® Cloning reaction incubation time was extended to 25 minutes. Up to 4 µL of cloning reaction was used to transform One Shot® TOP10 chemically competent cells. Transformation reactions were spread on LB plates containing 50 µg/mL kanamycin. At least five resulting colonies from each plate were picked and resuspended in a screening PCR cocktail, in 3 mL of LB medium containing 50 µg/mL kanamycin and streaked on storage LB plates with kanamycin. Additional colonies were streaked on a storage plate for further analysis if necessary. The 25 µL screening PCR cocktail was composed of 1x Red PCR Master Mix (Roalab, Germany), 1 % DMSO, 0.3 µM each upper (GGTGGAGGCTTGACATC) and lower (CTCCACGGAGCTGGGGTCTG) primer and ddH<sub>2</sub>O and produced amplicons of 1078 bp (exon 3). DNA Engine Dyad Peltier Thermal Cycler thermal conditions were as follows: 95 °C/2 minutes, 35x (95 °C/15 seconds, 66 °C/20 seconds, 70 °C/40 seconds), 70 °C/5 minutes and 15 °C.

Plasmids from screening PCR positive colonies grown in LB media were isolated with the 5 PRIME FastPlasmid Mini-Prep Kit (5 Prime, Germany), E.Z.N.A.® X-Press Plasmid DNA Mini Kit or the E.Z.N.A.® Plasmid Mini Kit I (Omega Bio-tek, GA, USA). DNA concentrations were determined by NanoDrop 1000 (NanoDrop Technologies, DE, USA).

Plasmids harboring maternal and paternal amplicons were analyzed by the TaqMan® SNP Genotyping Assay for rs4293393 allele and by Sanger sequencing for the *UMOD* mutation. Sequencing was performed by the BigDye® Terminator v3.1 Cycle Sequencing Kit (ThermoFisher Scientific, MA, USA) according to manufacturer's instructions in DNA Engine Dyad Peltier Thermal Cycler. Screening PCR primers and primer GGAATAGGGCTCAGATG were used for mutations in exon 3 and 4, respectively. Reactions were purified by the BigDye XTerminator™ Purification Kit and run on a 3500xL Genetic Analyzer equipped with 24

capillaries filled with POP-7™ Polymer (ThermoFisher Scientific, MA, USA). Data were collected using 3500 Series Data Collection Software v3.1 (3500 Series Data Collection Software) and analyzed in SeqMan Pro v10.1.2 (DNASTAR, WI, USA).

## 9. Supplementary Methods: *in vitro* score determination

Uromodulin expression constructs: cDNA of human wild type uromodulin was cloned in pcDNA 3.1(+) (ThermoFisher, Waltham, MA), and the HA tag was inserted after the leader peptide in between T26 and S27 in the protein sequence (19). The indicated mutant forms were obtained by mutagenesis using the Quickchange Lightning mutagenesis kit (Agilent, Santa Clara, CA) following the manufacturer's instructions. Primers were designed using the software QuikChange® Primer Design Program.

Cell culture conditions: MDCK or HEK cells were grown in Dulbecco's Modified Eagle's Medium (DMEM) supplemented with 10% Fetal Bovine Serum (FBS), 200 U/ml penicillin, 200 µg/ml streptomycin and 2 mM glutamine at 37°C, 5% CO<sub>2</sub>. Stable populations were generated by transfecting MDCK or HEK cells using lipofectamine 2000 (ThermoFisher) following the manufacturer's protocol. Selection was started 24 h after transfection by adding 0.5 or 0.25 mg/ml G418 (ThermoFisher) for MDCK or HEK cells respectively and was pursued for 1-2 weeks in order to obtain a population of G418-resistant cells.

Western blot: Cells were lysed in octylglucoside lysis buffer (50 mM Tris-HCl, pH 7.4, 150 mM NaCl, 60 mM octyl β-D-glucopyranoside, 10 mM NaF, 0.5 mM Sodium orthovanadate, 1 mM glycerophosphate and protease inhibitor cocktail (Sigma)) for 1 h at 4 °C under rotation followed by centrifugation 10 min at 17,000 g. Soluble fractions were quantified by the Bio-Rad Protein Assay (Bio-Rad). 20 µg of each protein lysate were loaded onto 8% reducing SDS-polyacrylamide gel. Transblotted nitrocellulose membranes (GE Healthcare, Little Chalfont, Buckinghamshire, United Kingdom) were incubated with a sheep anti-UMOD antibody (ab9029, Abcam, Cambridge, United Kingdom) followed by incubation with a donkey anti-sheep horseradish peroxidase-conjugated secondary antibody (1:7,500 dilution; Abcam). Protein bands were visualized with the Immobilon Western Chemiluminescent Horseradish Peroxidase Substrate kit (Millipore, Billerica, MA). Using ImageJ software (Schneider et al, Nature Methods, 2012, ), we quantified the ratio of ER retained protein (lower molecular-weight, Endo H sensitive) divided by the mature one (higher molecular-weight band, Endo H resistant). Based on this ratio, mutations were divided into 4 subgroups of severity regarding trafficking defect.

## 10. Supplementary References

1. Williams SE, Reed AA, Galvanovskis J, et al. Uromodulin mutations causing familial juvenile hyperuricaemic nephropathy lead to protein maturation defects and retention in the endoplasmic reticulum. *Hum Mol Genet.* 2009;18:2963-2974.
2. Rampoldi L, Scolari F, Amoroso A, et al. The rediscovery of uromodulin (Tamm-Horsfall protein): from tubulointerstitial nephropathy to chronic kidney disease. *Kidney Int.* 2011;80:338-347.
3. McBride MB, Rigden S, Haycock GB, et al. Presymptomatic detection of familial juvenile hyperuricaemic nephropathy in children. *Pediatr Nephrol.* 1998;12:357-364.
4. Devuyst O, Olinger E, Rampoldi L. Uromodulin: from physiology to rare and complex kidney disorders. *Nat Rev Nephrol.* 2017;13:525-544.
5. Bollée G, Dahan K, Flamant M, et al. Phenotype and outcome in hereditary tubulointerstitial nephritis secondary to UMOD mutations. *Clin J Am Soc Nephrol.* 2011;6:2429-2938.
6. Vylet'al P, Kublová M, Kalbáčová M, et al. Alterations of uromodulin biology: a common denominator of the genetically heterogeneous FJHN/MCKD syndrome. *Kidney Int.* 2006;70:1155-1169.
7. Moskowitz JL, Piret SE, Lhotta K, et al. Association between genotype and phenotype in uromodulin-associated kidney disease. *Clin J Am Soc Nephrol.* 2013;8:1349-1357.
8. Benetti E, Caridi G, Vella MD, et al. Immature renal structures associated with a novel UMOD sequence variant. *Am J Kidney Dis.* 2009, 53(2):327-31.
9. Ayasreh N, Bullich G, Miquel R, et al. Autosomal Dominant Tubulointerstitial Kidney Disease: Clinical Presentation of Patients With ADTKD-UMOD and ADTKD-MUC1. *Am J Kidney Dis.* 2018;72:411-418.
10. Ekici AB, Hackenbeck T, Morinière V, et al. Renal fibrosis is the common feature of autosomal dominant tubulointerstitial kidney diseases caused by mutations in mucin 1 or uromodulin. *Kidney Int.* 2014;86:589-599.
11. Lopes LB, Abreu CC, Souza CF, et al. Identification of a novel UMOD mutation (c.163G>A) in a Brazilian family with autosomal dominant tubulointerstitial kidney disease. *Braz J Med Biol Res.* 2018;51:e6560.
12. Scolari F, Caridi G, Rampoldi L, et al. Uromodulin storage diseases: clinical aspects and mechanisms. *Am J Kidney Dis.* 2004;44:987-999.

13. Gast C, Marinaki A, Arenas-Hernandez M, et al. Autosomal dominant tubulointerstitial kidney disease-UMOD is the most frequent non polycystic genetic kidney disease. *BMC Nephrol.* 2018;19:301.
14. Alaygut D, Torun-Bayram M, Soylu A, et al. Chronic kidney disease in an adolescent with hyperuricemia: familial juvenile hyperuricemic nephropathy. *Turk J Pediatr.* 2013;55:637-640.
15. Karbassi I, Maston GA, Love A, et al: A Standardized DNA Variant Scoring System for Pathogenicity Assessments in Mendelian Disorders. *Hum Mutat.* 2016;37:127-134.
16. Lhotta K, Piret SE, Kramar R, et al Epidemiology of uromodulin-associated kidney disease - results from a nation-wide survey. *Nephron Extra.* 2012;2:147-158.
17. Schaeffer C, Merella S, Pasqualetto E, et al. Mutant uromodulin expression leads to altered homeostasis of the endoplasmic reticulum and activates the unfolded protein response. *PLoS One.* 2017;12:e0175970.
18. Smith GD, Robinson C, Stewart AP, et al. Characterization of a recurrent in-frame UMOD indel mutation causing late-onset autosomal dominant end-stage renal failure. *Clin J Am Soc Nephrol.* 2011;6:2766-2674.
19. Lata S, Marasa M, Li Y, et al. Whole-Exome Sequencing in Adults with Chronic Kidney Disease: A Pilot Study. *Ann Intern Med.* 2018;168:100-109.
20. Wolf MT, Mucha BE, Attanasio M, et al. Mutations of the Uromodulin gene in MCKD type 2 patients cluster in exon 4, which encodes three EGF-like domains. *Kidney Int.* 2003;64:1580-1587.
21. Zaucke F, Boehnlein JM, Steffens S, et al. Uromodulin is expressed in renal primary cilia and UMOD mutations result in decreased ciliary uromodulin expression. *Hum Mol Genet.* 2010;19:1985-1997.
22. Calado J, Gaspar A, Clemente C, Rueff J. A novel heterozygous missense mutation in the UMOD gene responsible for Familial Juvenile Hyperuricemic Nephropathy. *BMC Med Genet.* 2005;6:5.
23. Kemter E, Fröhlich T, Arnold GJ, et al. Mitochondrial Dysregulation Secondary to Endoplasmic Reticulum Stress in Autosomal Dominant Tubulointerstitial Kidney Disease - UMOD (ADTKD-UMOD). *Sci Rep.* 2017;7:42970.
24. Hart TC, Gorry MC, Hart PS, et al. Mutations of the UMOD gene are responsible for medullary cystic kidney disease 2 and familial juvenile hyperuricaemic nephropathy. *J Med Genet.* 2002;39:882-892.

25. Dahan K, Devuyst O, Smaers M, et al. A cluster of mutations in the UMOD gene causes familial juvenile hyperuricemic nephropathy with abnormal expression of uromodulin. *J Am Soc Nephrol*. 2003;14:2883-2893.
26. Utami SB, Mahati E, Li P, et al. Apoptosis induced by an uromodulin mutant C112Y and its suppression by topiroxostat. *Clin Exp Nephrol*. 2015;19:576-584.
27. Edwards N, Olinger E, Adam J, et al. A novel homozygous UMOD mutation reveals gene dosage effects on uromodulin processing and urinary excretion. *Nephrol Dial Transplant*. 2017;32:1994-1999.
28. Puig JG, Prior C, Martínez-Ara J, Torres RJ. Familial nephropathy associated with hyperuricemia in Spain: our experience with 3 families harbouring a UMOD mutation. *Nucleosides Nucleotides Nucleic Acids*. 2006;25:1295-1300.
29. Satanovskij R, Bader A, Block M, et al. A new missense mutation in UMOD gene leads to severely reduced serum uromodulin concentrations - A tool for the diagnosis of uromodulin-associated kidney disease. *Clin Biochem*. 2017;50:155-158.
30. Lhotta K, Gehringer A, Jennings P, et al. Familial juvenile hyperuricemic nephropathy: report on a new mutation and a pregnancy. *Clin Nephrol*. 2009;71:80-83.
31. Bernascone I, Janas S, Ikehata M, et al. A transgenic mouse model for uromodulin-associated kidney diseases shows specific tubulo-interstitial damage, urinary concentrating defect and renal failure. *Hum Mol Genet*. 2010;19:2998-3010.
32. Lin Z, Yang J, Liu H, et al. A novel uromodulin mutation in autosomal dominant tubulointerstitial kidney disease: a pedigree-based study and literature review. *Ren Fail*. 2018;40:146-151.
33. Bleyer AJ, Hart TC, Shihabi Z, et al. Mutations in the uromodulin gene decrease urinary excretion of Tamm-Horsfall protein. *Kidney Int*. 2004;66:974-977.
34. Nakayama M, Mori Y, Ota N, et al. A Japanese Family Suffering from Familial Juvenile Hyperuricemic Nephropathy due to a Rare Mutation of the Uromodulin Gene. *Case Rep Nephrol Urol*. 2012;2:15-19.
35. Reindl J, Gröne HJ, Wolf G, Busch M. Uromodulin-related autosomal-dominant tubulointerstitial kidney disease-pathogenetic insights based on a case. *Clin Kidney J*. 2018;12:172-179.
36. Richmond JM, Kincaid-Smith P, Whitworth JA, Becker GJ. Familial urate nephropathy. *Clin Nephrol*. 1981;16:163-168.



37. Wolf MT, Beck BB, Zaucke F, et al. The Uromodulin C744G mutation causes MCKD2 and FJHN in children and adults and may be due to a possible founder effect. *Kidney Int.* 2007;71:574-581.
38. Rezende-Lima W, Parreira KS, García-González M, et al. Homozygosity for uromodulin disorders: FJHN and MCKD-type 2. *Kidney Int.* 2004;66:558-563.
39. Schäffer P, Gombos E, Meichelbeck K, et al. Childhood course of renal insufficiency in a family with a uromodulin gene mutation. *Pediatr Nephrol.* 2010;25:1355-1360.
40. Lens XM, Banet JF, Outeda P, Barrio-Lucía V. A novel pattern of mutation in uromodulin disorders: autosomal dominant medullary cystic kidney disease type 2, familial juvenile hyperuricemic nephropathy, and autosomal dominant glomerulocystic kidney disease. *Am J Kidney Dis.* 2005;46:52-57.
41. Rampoldi L, Caridi G, Santon D, et al. Allelism of MCKD, FJHN and GCKD caused by impairment of uromodulin export dynamics. *Hum Mol Genet.* 2003;12:3369-3384.
